# Supplementary material
Source: Research Square preprint supplement (doi:10.21203/rs.3.rs-7564643/v1)
Supplement: Supplementary file 1 [file dcc65eb9328cec63fb240e28.docx]

Supplementary files

**Table S1** Chemical composition (%) of the tested LEO

| Category | Xinxun 1 (*L. angustifolia*) | Xinxun 2 (*L. angustifolia*) | Xinxun 3 (*L. angustifolia*) | Xinxun 4 (*Lavandula*×intermedia) |
| --- | --- | --- | --- | --- |
| **Monoterpenes** |  |  |  |  |
| (-)-alpha-Pinene | 5.43 | 0.15 | 0.23 | 0.58 |
| Camphene | 2.41 | 0.07 | 0.16 | 0.3 |
| beta-Pinene | 1.47 | 0.04 | 0.04 | 0.64 |
| Sabinene | 1.4 | 0.02 | 0.02 | 0.15 |
| (+)-3-Carene | 1.3 | 0.03 | 0.19 | 0.02 |
| Myrcene | 0.96 | 0.21 | 0.14 | 0.28 |
| beta-OCIMENE, (3E)- | 0.43 | 0.42 | 0.29 | 4.74 |
| Terpinolene | 0.06 | 0.37 | - | 0.17 |
| Tricyclene | 6.67 | 0.02 | 0.04 | 0.03 |
| alpha-Santalene | 0.25 | 0.08 | 0.33 | 0.44 |
| Cycloheptatriene | 3.17 | 0.01 | 0.01 | 0.01 |
| 6-Methyl-1,2,3,5,8,8a-hexahydronaphthalene | 0.01 | 0.04 | 0.01 | 0.01 |
| Linalool, (+-)- | 0.3 | 32.19 | 38.08 | 24.13 |
| Isopulegol | 0.18 | 3.22 | 4.74 | 2.18 |
| l-Menthol | 0.11 | 0.2 | - | 0.03 |
| Lavandulol | 0.09 | 0.28 | 0.65 | 0.45 |
| Alpha-Terpineol | 0.02 | - | 0.43 | 0.66 |
| Isoborneol | 0.02 | - | 0.48 | - |
| Geraniol | 0.01 | 0.19 | 0.05 | 0.05 |
| Nerol | 0.01 | 0.06 | - | 0.04 |
| (+)-cis-Verbenol | 0.01 | 0.01 | - | 0.01 |
| p-Cymen-8-ol | 0.01 | 0.01 | 0.03 | 0.01 |
| Camphor | 0.34 | 0.09 | 0.18 | 12.92 |
| Eucalyptol | 0.78 | 1.09 | 1.56 | 19.4 |
| Cyclohexanol, 5-methyl-2-(1-methylethenyl)- | 0.2 | 4.79 | 5.27 | 0.66 |
| 1-Methyl-4-(1-methylvinyl)cyclohexan-1-ol | 0.02 | 0.04 | 0.05 | 0.08 |
| **Sesquiterpenes** |  |  |  |  |
| Caryophyllene | 0.14 | 2.68 | 2.48 | 0.07 |
| Beta-Bisabolene | - | 0.02 | 0.03 | 0.01 |
| Alpha-Farnesene | 0.1 | 0.49 | 0.43 | 0.15 |
| (Z,E)-alpha-Farnesene | 0.27 | 0.01 | 0.01 | 0.03 |
| (1R,4aR,8aS)-7-methyl-4-methylidene-1-propan-2-yl-2,3,4a,5,6,8a-hexahydro-1H-naphthalene | 0.01 | 0.06 | 0.06 | 0.05 |
| Cadin-4-en-10-ol | 0.01 | 0.06 | 0.06 | 0.1 |
| beta-CARYOPHYLLENE OXIDE | 0.01 | 0.07 | 0.35 | 0.05 |
| Terpenoid Derivatives |  |  |  |  |
| alpha-Pinene oxide | 0.05 | 0.01 | 0.02 | 0.01 |
| (+)-trans-Limonene oxide | 0.01 | 0.03 | - | 0.01 |
| 1,2-Epoxydodecane | - | - | 0.03 | - |
| Linalyl acetate | 0.27 | 35.97 | 30.42 | 20.43 |
| Isobornyl formate | 0.23 | 0.22 | 0.14 | 0.02 |
| Isopulegyl acetate | 0.23 | 5.94 | 4.68 | 1.9 |
| Lavandulyl acetate, (+/-)- | 0.13 | 0.09 | 3.65 | 0.01 |
| Hexyl isobutyrate | 0.05 | 0.03 | 0.02 | 0.07 |
| 1-Octen-3-yl acetate | 0.05 | 1.99 | 0.22 | 0.22 |
| Hexyl isovalerate | 0.03 | 0.14 | 0.21 | 0.12 |
| Neryl acetate | 0.02 | 0.31 | 0.17 | 0.2 |
| Geranyl acetate | 0.01 | 0.22 | 0.14 | 0.17 |
| Menthyl acetate | - | 0.04 | 0.02 | 0.01 |
| 3-Hexenyl butyrate, (3Z)- | - | 0.01 | 0.04 | 0.01 |
| Hexyl formate | 7.92 | 0.01 | 0.02 | 0.02 |
| 3-Nonanol, 1,2:6,7-diepoxy-3,7-dimethyl-, acetate | 0.01 | 0.04 | - | 0.01 |
| **Aliphatic compounds** |  |  |  |  |
| 1-Hexanol | 0.05 | 0.01 | 0.01 | 0.01 |
| trans-3-Hexen-1-ol | 0.04 | 0.01 | 0.01 | 0.01 |
| 1-Octen-3-ol | 0.03 | 0.33 | 0.34 | 0.34 |
| 2-Methyl-3-buten-1-ol | 3.34 | 0.01 | 0.01 | 0.01 |
| 3-Cyclopentene-1,2-diol | 28.07 | 0.01 | 0.01 | 0.01 |
| 1,1-Cyclohexanedimethanol | 0.08 | 0.11 | 0.04 | - |
| Deanol | 31.58 | 0.01 | 0.01 | 0.01 |
| 3,7-Cycloundecadien-1-ol, 1,5,5,8-tetramethyl-, (-)- | - | 0.02 | 0.02 | 0.01 |
| 5-Methylheptan-3-one | 0.08 | 0.01 | 0.03 | 0.1 |
| 3,5-Heptadienal, 2-ethylidene-6-methyl- | 0.03 | 0.02 | 0.02 | 0.01 |
| **Aromatic/Heterocyclic** |  |  |  |  |
| 2-Furanmethanol, 5-ethenyltetrahydro-alpha,alpha,5-trimethyl-, trans- | 0.4 | 0.17 | 0.14 | 0.05 |
| o-Cymene | 0.06 | 0.35 | 0.52 | 0.06 |
| **Other special structures** |  |  |  |  |
| 3-Octen-5-yne, 2,7-dimethyl-, (E)- | 0.67 | 4.69 | 1.62 | 3.16 |
| Ethylidenecyclopropane | 0.04 | 0.01 | 0.01 | 0.02 |
| 1-Hexene | 0.08 | - | - | 0.06 |
| 1,7,7-Trimethylbicyclo[2.2.1]heptan-2-ol | - | - | 0.65 | 3.83 |

Note: -, represents not detectable.

**Table S2** List of abbreviations

| **Full name** | **Abbreviations** |
| --- | --- |
| Lavandula × intermedia | Xinxun 4 |
| Protein-protein interaction | PPI |
| gene ontology | GO |
| Kyoto encyclopedia of genes and genomes | KEGG |
| lavender essential oil | LEO |
| Staphylococcus aureus | S.aureus |
| 2,2-diphenyl-1-picryl-hydrazyl | DPPH |
| malondialdehyde | MDA |
| volatile organic compounds | VOCs |
| Lavandula angustifolia Mill | L. angustifolia, shorted as LA |
| Lavandula latifolia Vill | L. latifolia, shorted as LL |
| gas chromatography-mass spectrometry | GC-MS |
| dimethyl sulfoxide | DMSO |
| minimum inhibitory concentration | MIC |
| analysis of variance | ANOVA |
| prostaglandin-endoperoxide synthase 2 | PTGS2 |
| glycogen synthase kinase 3β | GSK3B |
| biological process | BP |
| molecular function | MF |
| cellular component | CC |
| binding energies | ΔG |
| inhibition zone | IZ |
| L-ascorbic acid | LAA |
| thiobarbituric acid | TBA |
| C-type lectin receptor | CLR |
| Tumor Necrosis Factor | TNF |
| T-cell receptor | TCR |
| cytotoxic T lymphocytes | CTLs |
